# Supplementary material
Source: publisher figshare collection journal article supplement (https://tandf.figshare.com/articles/dataset/_/12844517)
Supplement: Supplementary file 1 [file 1]

## A Proof

### A.1 Proof for 3.1

*Proof.* Let  $\eta_j^k$  be the objective function value of the  $j$ th step in sub-problem 2, defined below:

$$\min_{\beta} \tilde{l}^k(\beta) + \sum_{i=1}^{j-1} \tilde{f}_i^{k+1}(\beta) + f_j(\beta) + \sum_{i=j+1}^N \tilde{f}_i^k(\beta) + \frac{\rho}{2} \|\beta - \beta^k\|_2^2.$$

From the successive linearization of  $l(\beta)$  and  $f_j(\beta)$ , it can be shown:

$$\eta^k \leq \eta_1^k \leq \eta_2^k \leq \dots \leq \eta_N^k \leq \eta^{k+1}.$$

We explain why  $\eta^k \leq \eta_1^k$  where

$$\begin{aligned} \eta^k &= \min_{\beta} l(\beta) + \sum_{i=1}^N \tilde{f}_i^k(\beta) + \frac{\rho}{2} \|\beta - \beta^k\|_2^2, \\ z^k &= \arg \min_{\beta} l(\beta) + \sum_{i=1}^N \tilde{f}_i^k(\beta) + \frac{\rho}{2} \|\beta - \beta^k\|_2^2, \\ \eta_1^k &= \min_{\beta} \tilde{l}^k(\beta) + f_1(\beta) + \sum_{i=2}^N \tilde{f}_i^k(\beta) + \frac{\rho}{2} \|\beta - \beta^k\|_2^2. \\ z_1^{k+1} &= \arg \min_{\beta} \tilde{l}^k(\beta) + f_1(\beta) + \sum_{i=2}^N \tilde{f}_i^k(\beta) + \frac{\rho}{2} \|\beta - \beta^k\|_2^2, \end{aligned}$$

where  $\tilde{l}^k(\beta) = l(z^k) + \langle g^k, \beta - z^k \rangle$ , and  $g^k \in \partial l(z^k)$ . Since:

$$z^k = \arg \min_{\beta} l(\beta) + \sum_{i=1}^N \tilde{f}_i^k(\beta) + \frac{\rho}{2} \|\beta - \beta^k\|_2^2.$$

according to optimality condition and  $g^k \in \partial l(z^k)$  .:

$$z^k = \arg \min_{\beta} \tilde{l}^k(\beta) + \sum_{i=1}^N \tilde{f}_i^k(\beta) + \frac{\rho}{2} \|\beta - \beta^k\|_2^2.$$

Replace the term  $\tilde{f}_1^k(\beta)$  of the problem above with  $f_1(\beta)$ , since  $\tilde{f}_1^k(\beta) \leq f_1(\beta)$ , we always have:

$$\tilde{l}^k(\beta) + \sum_{i=1}^N \tilde{f}_i^k(\beta) + \frac{\rho}{2} \|\beta - \beta^k\|_2^2 \leq \tilde{l}^k(\beta) + f_1(\beta) + \sum_{i=2}^N \tilde{f}_i^k(\beta) + \frac{\rho}{2} \|\beta - \beta^k\|_2^2$$

Therefore,  $\eta^k \leq \eta_1^k$ .

We approximate the increase made from  $\eta^k$  to  $\eta_N^k$  where:

$$\begin{aligned} \eta^k &= \min_{\beta} l(\beta) + \sum_{i=1}^N \tilde{f}_i^k(\beta) + \frac{\rho}{2} \|\beta - \beta^k\|_2^2, \\ \eta_N^k &= \min_{\beta} \tilde{l}^k(\beta) + \sum_{i=1}^{N-1} \tilde{f}_i^{k+1}(\beta) + f_N(\beta) + \frac{\rho}{2} \|\beta - \beta^k\|_2^2. \end{aligned}$$

Consider a family of relaxation, given by

$$Q_k(\beta, \mu) = \sum_{j=1}^N \left[ (1-\mu)(f_j(z_j^k) + \langle g_j^k, \beta - z_j^k \rangle) + \mu(f_j(z^k) + \langle s_j^k, \beta - z^k \rangle) \right] + \tilde{t}^k(\beta) + \frac{\rho}{2} \|\beta - \beta^k\|^2,$$

where  $g_j^k \in \partial f_j(z_j^k)$  and  $s_j^k$  is any element of  $\partial f_j(z^k)$ . We can see that  $Q_k(\beta, \mu)$  is a relaxation of  $\eta_N^k$  for  $\mu \in [0, 1]$  and when  $\mu = 0$ ,  $\min_{\beta} Q_k(\beta, 0) = \eta^k$ . Denote  $\hat{Q}_k(\beta, \mu) = \min_{\beta} Q_k(\beta, \mu)$ . The increase from  $\eta^k$  to  $\eta_N^k$  can be bounded by

$$\eta_N^k - \eta^k \geq \max_{\mu \in [0, 1]} \hat{Q}_k(\beta, \mu) - \hat{Q}_k(\beta, 0).$$

It can be easily seen that the optimal solution  $\hat{\beta}(\mu)$  to the preceding maximization can be solved in closed-form:

$$\arg \min_{\beta} Q_k(\beta, \mu) = \beta^k - (g^k + \sum_{i=1}^N g_i^k + \mu(s_j^k - g_j^k)) / \rho.$$

We also have:

$$\nabla_{\mu} \hat{Q}_k(\mu) = -\mu \left\| \sum_{j=1}^N s_j^k - g_j^k \right\|_2^2 / \rho + F(z^k) - \tilde{F}^k(z^k).$$

For a fixed  $\tilde{\mu} \in [0, 1]$ , we have:

$$\hat{Q}_k(\tilde{\mu}) - \hat{Q}_k(0) = \int_0^{\tilde{\mu}} \hat{Q}'_k(\mu) d\mu = \tilde{\mu} (F(z^k) - \tilde{F}^k(z^k)) - \frac{1}{2\rho} \tilde{\mu} \left\| \sum_{j=1}^N s_j^k - g_j^k \right\|_2^2.$$

Choosing  $\tilde{\mu} = \min(1, \frac{\rho(F(z^k) - \tilde{F}^k(z^k))}{\left\| \sum_{j=1}^N s_j^k - g_j^k \right\|_2^2})$ , we obtain:  $\eta_N^k - \eta^k \geq \frac{1}{2} \tilde{\mu} (F(z^k) - \tilde{F}^k(z^k))$ .  $\square$

## A.2 Proof for Theorem 3.2

*Proof.*

- (i) Can be deduced from Lemma 1 and the condition for update step.
- (ii) The first part is straight forward using Lemma 1 and the condition for update step. By the construction of the sub-gradients in sub-problem 1, we have:

$$-\rho(z^k - \beta^k) = g^k + \sum_{i=j}^N g_j^{k-1} \in \partial \tilde{F}^k(z^k).$$

By the definition of sub-gradients, we obtain:

$$\vartheta^k = F(\beta^k) - \tilde{F}^k(z^k) \geq \tilde{F}(\beta^k) - \tilde{F}^k(z^k) \geq \rho \|z^k - \beta^k\|_2^2.$$

If  $\vartheta = 0$  then  $z^k = \beta^k$ . Let  $\beta^k$  be the last estimate.

Let  $p(\beta^k) = \arg \min_{\beta} F(\beta) + \frac{\rho}{2} \|\beta - \beta^k\|_2^2$ . Because  $F(\beta) \geq \tilde{F}^k(\beta)$  and  $z^k = \arg \min_{\beta} \tilde{F}^k + \frac{\rho}{2} \|\beta - \beta^k\|_2^2$ , we have:

$$F(p(\beta^k)) + \frac{\rho}{2} \|p(\beta^k) - \beta^k\|_2^2 \geq \tilde{F}^k(z^k) + \frac{\rho}{2} \|p(\beta^k) - z^k\|_2^2 + \frac{\rho}{2} \|z^k - \beta^k\|_2^2.$$

Similarly, we have:

$$F(z^k) + \frac{\rho}{2} \|z^k - \beta^k\|_2^2 \geq F(p(\beta^k)) + \frac{\rho}{2} \|z^k - p(\beta^k)\|_2^2 + \frac{\rho}{2} \|p(\beta^k) - \beta^k\|_2^2.$$

Adding the two inequalities we obtain:

$$F(z^k) - \tilde{F}^k(z^k) \geq \rho \|z^k - p(\beta^k)\|_2^2.$$

The  $LHS \rightarrow 0$  therefore  $z^k \rightarrow p(\beta^k)$ . Since  $z^k = \beta^k$ , we have  $\beta^k = \arg \min_{\beta} F(\beta) + \frac{\rho}{2} \|\beta - \beta^k\|_2^2$  or  $\beta^k \in \arg \min F$ .

(iii) Can be deduced from Lemma 1 and the condition for update step.

□

### A.3 Proof for Theorem 3.3

*Proof.* We have:

$$\begin{aligned} \|\beta^{k+1} - \tilde{\beta}\|_2^2 - \|\beta^k - \tilde{\beta}\|_2^2 &= \langle \beta^{k+1} - \beta^k, \beta^k - \beta^{k+1} + 2\beta^{k+1} - 2\tilde{\beta} \rangle \\ &\leq 2 \frac{\tilde{F}^k(\tilde{\beta}) - \tilde{F}^k(\beta^{k+1})}{\rho} \leq 2 \frac{F(\tilde{\beta}) - F(\beta^k) + \vartheta_k}{\rho} \\ &\leq 2 \frac{\vartheta_k}{\rho} \leq \frac{2}{\rho} (F(\beta^k) - F(\beta^{k+1}))/\gamma. \end{aligned} \quad (1)$$

Sum these inequalities up in terms of  $k$ , using the fact that  $F$  is finite-valued, we have  $\{\beta^k\}$  is bounded, thus, it has a limit point  $\tilde{\beta}$ . Since  $F$  is a closed function,  $F(\tilde{\beta}) \leq \liminf_{\beta^k \rightarrow \tilde{\beta}} F(\beta^k)$ , hence, the same inequality applies for  $\tilde{\beta}$ :

$$\|\beta^{k+1} - \tilde{\beta}\|_2^2 - \|\beta^k - \tilde{\beta}\|_2^2 \leq 2 \frac{\vartheta_k}{\rho}. \quad (2)$$

Consider two subsequences:  $\{\beta_i^{k1}\} \rightarrow \tilde{\beta}$  and  $\{\beta_j^{k2}\} \rightarrow \tilde{\beta}$ . For some  $i \geq j$ , combine the two inequalities above we have:

$$\|\beta_i^{k1} - \tilde{\beta}\|_2^2 \leq \|\beta_j^{k2} - \tilde{\beta}\|_2^2 + \sum_{k \geq j} \frac{2}{\rho} \vartheta_k. \quad (3)$$

Since  $\vartheta^k \rightarrow 0$ ,  $\sum_{k \in \mathcal{K}} \vartheta^k \leq \infty$ , so  $\sum_{k \geq j} \vartheta^k \rightarrow 0$ . The RHS of the inequality  $\rightarrow 0$  or  $\{\beta_i^{k1}\} \rightarrow \tilde{\beta}$ . Therefore there is only a unique limit point  $\tilde{\beta}$ .

By construction, the subgradient of function  $F$  at the point  $z^k$  can be written as  $g^k + \sum_{i=1}^N g_i^k = -\rho(z^k - \beta^k)$ . Thus, for all  $\beta$ , we obtain:

$$\begin{aligned} F(\beta) &\geq l(z^k) + \sum_{i=1}^N f_i(z^k) + \langle g^k + \sum_{i=1}^N g_i^k, \beta - z^k \rangle \\ &= F(\beta^k) - \vartheta^k + \langle g^k + \sum_{i=1}^N g_i^k, \beta - z^k \rangle. \end{aligned}$$

Before we had  $\rho \|z^k - \beta^k\| \leq \vartheta^k$  and  $\vartheta^k \rightarrow 0$ , it follows that  $z^k - \beta^k \rightarrow 0$ . Furthermore, the sequence  $z^k \rightarrow \tilde{\beta}$ . This implies that  $g^k + \sum_{i=1}^N g_i^{k-1} \rightarrow 0$ , and  $F(\beta) \geq \lim F(\beta^k) \geq F(\tilde{\beta})$ .  $\square$

#### A.4 Proof for Lemma 3.4

*Proof.* Since iteration  $k$  is a null step we have:

$$\begin{aligned} F(z^k) &> F(\beta^k) - \gamma(F(\beta^k) - \tilde{F}(z^k)) \\ F(z^k) - \tilde{F}(z^k) &> (1 - \gamma)(F(\beta^k) - \tilde{F}(z^k)) = (1 - \gamma)\vartheta^k \end{aligned}$$

Thus,

$$\begin{aligned} F(\beta^k) - \eta^{k+1} &\leq F(\beta^k) - \eta^k - \frac{1}{2}\tilde{\mu}(F(z^k) - \tilde{F}(z^k)) \\ &\leq F(\beta^k) - \eta^k - \frac{1}{2}\tilde{\mu}(1 - \gamma)(F(\beta^k) - \tilde{F}(z^k)) \\ &\leq (1 - \frac{1}{2}\tilde{\mu}(1 - \gamma))(F(\beta^k) - \eta^k) \end{aligned}$$

By the definition of  $\tilde{\mu} = \min(1, \frac{\rho(F(z^k) - \tilde{F}(z^k))}{\|\sum_{i=1}^N s_i^k - g_i^{k-1}\|^2})$  and since  $f_i$ 's are finite-valued convex functions, so the norm of the sub-gradients is bounded so there exists  $M > 0$  such that

$$\rho \|\sum_{i=1}^N s_i^k - g_i^{k-1}\|_2^2 \leq M.$$

Thus, we obtain:

$$F(\beta^k) - \eta^{k+1} \leq (1 - \frac{(1 - \gamma)^2 \varepsilon}{M})(F(\beta^k) - \eta^k).$$

$\square$

#### A.5 Proof for Lemma 3.6

*Proof.* By definition of  $F_\rho(\beta^k)$  we have:

$$\begin{aligned} \min_{\beta} \{F(\beta) + \frac{\rho}{2}\|\beta - \beta^k\|_2^2\} &\geq \min_{\beta} \{\tilde{F}(\beta) + \frac{\rho}{2}\|\beta - \beta^k\|_2^2\} \\ &= \tilde{F}(z^k) + \frac{\rho}{2}\|z^k - \beta^k\|_2^2 > \tilde{F}(z^k) \end{aligned}$$

Using Theorem 2.5, we have:

$$F_\rho(\beta^k) \leq F(\beta^k) - \rho \|\beta^k - \beta^*\|_2^2 \varphi\left(\frac{F(\beta^k) - F(\beta^*)}{\rho \|\beta^k - \beta^*\|_2^2}\right).$$

Case 1:  $\alpha\rho\|\beta^k - \beta^*\|^2 \leq F(\beta^k) - F(\beta^*) \leq \rho\|\beta^k - \beta^*\|_2^2$ ,

$$F_\rho(\beta^k) \leq F(\beta^k) - \frac{(F(\beta^k) - F(\beta^*))^2}{\rho\|\beta^k - \beta^*\|_2^2}.$$

Combine the above inequalities we have:

$$\alpha(F(\beta^k) - F(\beta^*)) \leq F(\beta^k) - \tilde{F}(z^k).$$

Case 2:  $F(\beta^k) - F(\beta^*) \geq \rho\|\beta^k - \beta^*\|_2^2$ .

Similarly we obtain a simple relation:

$$\begin{aligned} F_\rho(\beta^k) &\leq F(\beta^k) - 2(F(\beta^k) - F(\beta^*)) + \rho\|\beta^k - \beta^*\|_2^2. \\ 2(F(\beta^k) - F(\beta^*)) - \rho\|\beta^k - \beta^*\|_2^2 &\leq F(\beta^k) - \tilde{F}(z^k) \\ F(\beta^k) - F(\beta^*) &\leq F(\beta^k) - \tilde{F}(z^k). \end{aligned}$$

When a *descent step* happens for Case 1:

$$\begin{aligned} F(z^k) &\leq (1 - \gamma)F(\beta^k) + \gamma\tilde{F}(z^k) \\ &\leq (1 - \gamma)F(\beta^k) + \gamma((1 - \alpha)F(\beta^k) + \alpha F(\beta^*)) \\ &\leq (1 - \gamma\alpha)(F(\beta^k) - F(\beta^*)) + F(\beta^*). \end{aligned}$$

Same argument applied for Case 2, we obtained linear convergence rate for *descent steps*:

$$F(z^k) - F(\beta^*) \leq (1 - \min(\alpha, 1)\gamma)(F(\beta^k) - F(\beta^*)).$$

□

## A.6 Proof for Lemma 3.7

*Proof.*

$$\begin{aligned}
\eta^k &= \min_{\beta} l(\beta) + \sum_{i=1}^N f_i(z_i^k) + \langle g_i^k, \beta - z_i^k \rangle + \frac{\rho}{2} \|\beta - \beta^k\|_2^2 \\
&\geq \min_{\beta} l(\beta^k) + \langle g^k, \beta - \beta^k \rangle + \sum_{i=1}^N f_i(z_i^k) + \langle g_i^k, \beta - z_i^k \rangle + \frac{\rho}{2} \|\beta - \beta^k\|_2^2 \\
&= \min_{\beta} l(\beta^k) + \langle g^k, \beta - \beta^k \rangle + \sum_{i=1}^{N-1} f_i(z_i^k) + \langle g_i^k, \beta - z_i^k \rangle + f_N(\beta) + \frac{\rho}{2} \|\beta - \beta^k\|_2^2 \\
&\geq \min_{\beta} l(\beta^k) + \langle g^k, \beta \rangle + \sum_{i=1}^{N-1} f_i(z_i^k) + \langle g_i^k, \beta \rangle + f_N(z_i^{k-1}) + \langle g_i^{k-1}, \beta - z_i^{k-1} \rangle + \frac{\rho}{2} \|\beta - \beta^k\|_2^2 \\
&= \dots \\
&\geq \min_{\beta} l(\beta^k) + \langle g^k, \beta - \beta^k \rangle + \sum_{i=1}^N f_i(z_i^{k-1}) + \langle g_i^{k-1}, \beta - z_i^{k-1} \rangle + \frac{\rho}{2} \|\beta - \beta^k\|_2^2 \\
&= \eta^{k-1} - \langle g^k, \beta^k \rangle - \sum_{i=1}^N \langle g_i^{k-1}, \beta^k \rangle + \langle g^k, \beta \rangle + \sum_{i=1}^N \langle g_i^{k-1}, \beta \rangle - \frac{\rho}{2} \|\beta^k - \beta^{k-1}\|_2^2 + \frac{\rho}{2} \|\beta - \beta^k\|_2^2 \\
&= \eta^{k-1} + \min_{\beta} \langle g^k + \sum_{i=1}^N g_i^{k-1}, \beta - \beta^k \rangle - \frac{\rho}{2} \|\beta^k - \beta^{k-1}\|_2^2 + \frac{\rho}{2} \|\beta - \beta^k\|_2^2
\end{aligned}$$

From the optimality condition of the first sub-problem, we have  $g^k + \sum_{i=1}^N g_i^{k-1} = -\rho(\beta^k - \beta^{k-1})$ . Replace this relation into the above inequality to obtain:

$$\begin{aligned}
\eta^k &\geq \eta^{k-1} + \min_{\beta} \langle -\rho(\beta^k - \beta^{k-1}), \beta - \beta^k \rangle - \frac{\rho}{2} \|\beta^k - \beta^{k-1}\|_2^2 + \frac{\rho}{2} \|\beta - \beta^k\|_2^2 \\
\langle -\rho(\beta^k - \beta^{k-1}), \beta - \beta^k \rangle + \frac{\rho}{2} \|\beta - \beta^k\|_2^2 &\text{ minimizes at } \beta = 2\beta^k - \beta^{k-1} \text{ with value } \\
&-\frac{\rho}{2} \|\beta^k - \beta^{k-1}\|_2^2. \text{ Thus we have:}
\end{aligned}$$

$$\eta^k \geq \eta^{k-1} - \rho \|\beta^k - \beta^{k-1}\|_2^2$$

By the update step rule:

$$\begin{aligned}
F(\beta^k) &\leq F(\beta^{k-1}) - \gamma(F(\beta^{k-1}) - \eta^k) + \frac{\rho}{2} \|\beta^k - \beta^{k-1}\|_2^2 \\
\frac{1}{\gamma}(F(\beta^{k-1}) - F(\beta^k)) &\geq F(\beta^{k-1}) - \eta^k + \frac{\rho}{2} \|\beta^k - \beta^{k-1}\|_2^2 \\
\frac{1}{\gamma}(F(\beta^{k-1}) - F(\beta^k)) &\geq \frac{\rho}{2} \|\beta^k - \beta^{k-1}\|_2^2 + \frac{\rho}{2} \|\beta^k - \beta^{k-1}\|_2^2 = \rho \|\beta^k - \beta^{k-1}\|_2^2
\end{aligned}$$

The last inequality is due to Theorem 2.2.  $\square$

### A.7 Proof for Lemma 3.8

*Proof.* From Lemma 3.3, we have:

$$\begin{aligned}
F(\beta^k) - \eta^k &\leq \frac{1}{\gamma}(F(\beta^{k-1}) - F(\beta^k)) - \frac{\rho}{2}\|\beta^k - \beta^{k-1}\|_2^2 \\
&\leq \frac{1}{\gamma}(F(\beta^{k-1}) - F(\beta^k)) + \frac{1}{2\gamma}(F(\beta^{k-1}) - F(\beta^k)) \\
&= \frac{3}{2\gamma}(F(\beta^{k-1}) - F(\beta^k))
\end{aligned}$$

□

### A.8 Proof for Lemma 3.9

*Proof.* By Theorem 3.1:

$$F_\rho(\beta^k) \leq F(\beta^k) - \rho\|\beta^k - \beta^*\|_2^2 \varphi\left(\frac{F(\beta^k) - F(\beta^*)}{\rho\|\beta^k - \beta^*\|_2^2}\right) \leq F(\beta^k) - \rho\|\beta^k - \beta^*\|_2^2 \varphi(\alpha)$$

Also by definition of  $F_\rho(\beta^k)$  :

$$F(\beta^*) + \frac{\rho}{2}\|\beta^* - \beta^k\|_2^2 \geq F_\rho(\beta^k)$$

So:

$$\begin{aligned}
F_\rho(\beta^k) &\leq F(\beta^k) - 2(F_\rho(\beta^k) - F(\beta^*))\varphi(\alpha) \\
\eta^k &\leq F_\rho(\beta^k) \leq \frac{F(\beta^k) + 2F(\beta^*)\varphi(\alpha)}{2\varphi(\alpha) + 1}
\end{aligned}$$

□

## B Plots and graphs

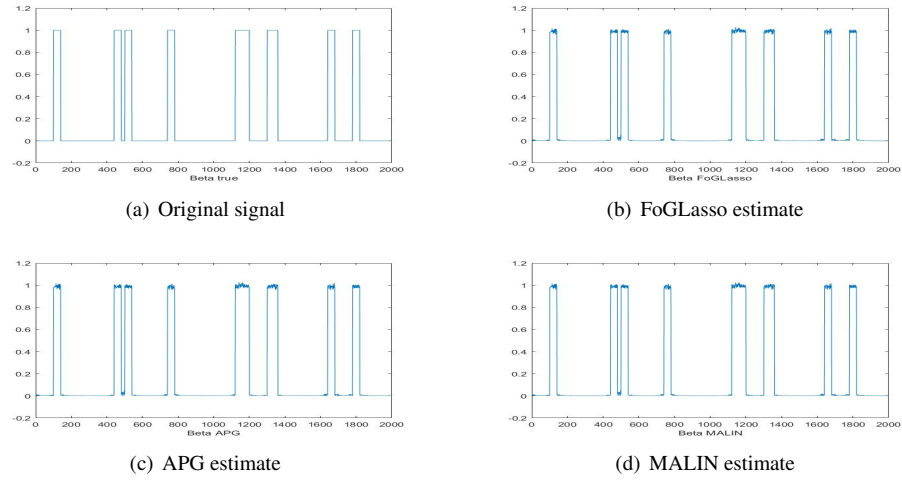

Figure 1: Comparison of solutions' quality.

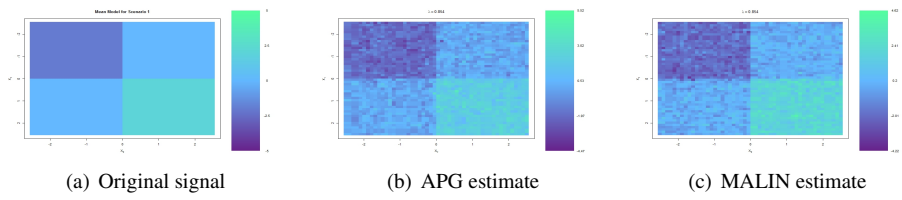

Figure 2: Scenario 1

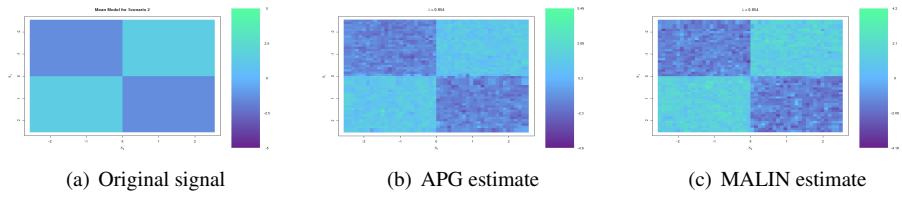

Figure 3: Scenario 2

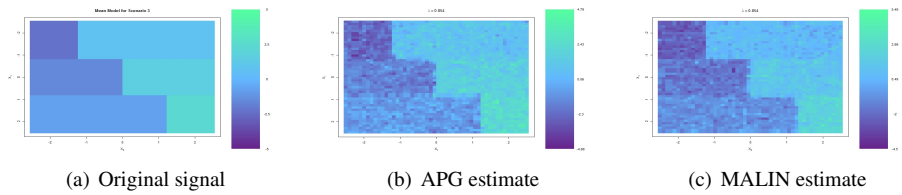

Figure 4: Scenario 3



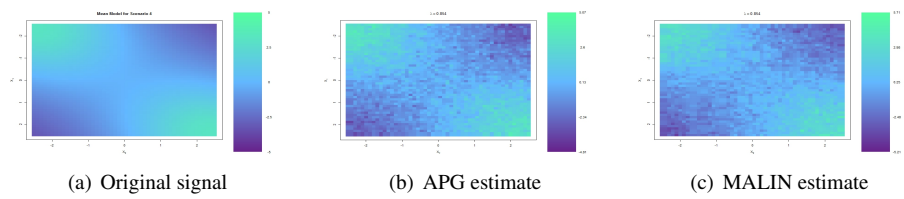

Figure 5: Scenario 4

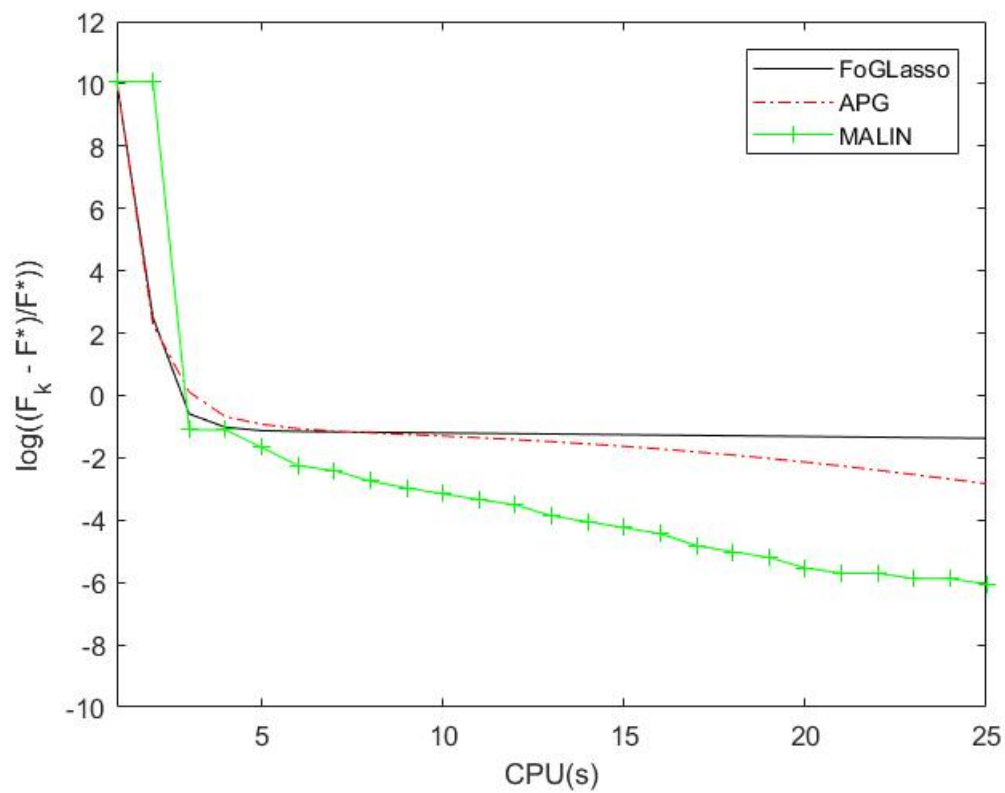

(a)  $n = 1000, p = 2000$

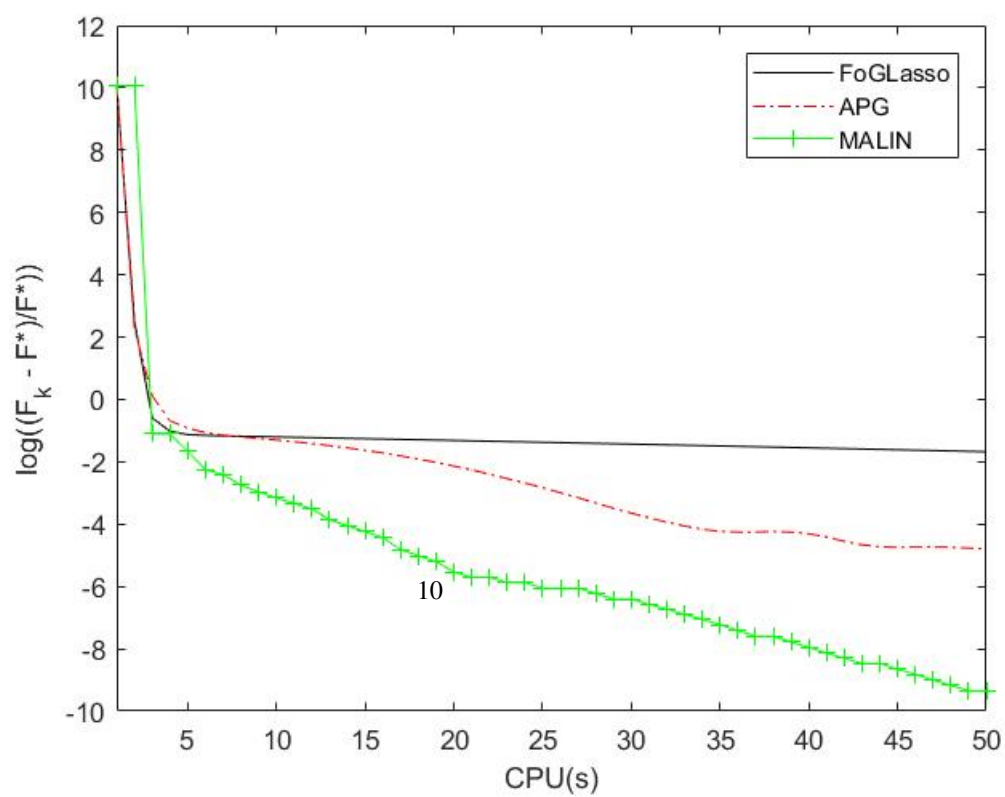

(b)  $n = 1000, p = 5000$
